# Supplementary material for: Application of an online ion-chromatography-based instrument for gradient flux measurements of speciated nitrogen and sulfur
Source: Copernicus journal article supplement (doi:10.5194/amt-9-2581-2016), 2016-06-17
Supplement: Supplementary file 1 [file amt-9-2581-2016-supplement.pdf]

Supplement of Atmos. Meas. Tech., 9, 2581–2592, 2016  
<http://www.atmos-meas-tech.net/9/2581/2016/>  
doi:10.5194/amt-9-2581-2016-supplement  
© Author(s) 2016. CC Attribution 3.0 License.

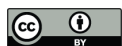

*Supplement of*

## **Application of an online ion-chromatography-based instrument for gradient flux measurements of speciated nitrogen and sulfur**

**Ian C. Rumsey and John T. Walker**

*Correspondence to:* Ian C. Rumsey (rumseyic@cofc.edu)

The copyright of individual parts of the supplement might differ from the CC-BY 3.0 licence.

## 1 **Section S2.2 Solutions used in MARGA ion chromatography system**

2 The MARGA system requires the following chemicals: absorbance solution, internal  
3 standard solution, ion chromatography (IC) eluents, and suppressor regenerant. All chemicals are  
4 prepared with 18.2 M $\Omega$ .cm double deionized (DDI) water.

5 The absorbance solution serves as the medium for gases to diffuse into in the WRD and  
6 to supersaturate the SJAC to allow particles to grow and thus produce a condensate of water  
7 soluble aerosol. It is also used as a carrier liquid to allow the sample to flow through the  
8 MARGA system. Absorption solution is made in batches of 20 L using DDI water. Additionally,  
9 to prevent the growth of bacteria in the MARGA system, 10 ppm hydrogen peroxide (0.7 mL of  
10 30% H<sub>2</sub>O<sub>2</sub>) is added to the absorbance solution. During continuous operation, the MARGA  
11 requires 5 L of absorption solution per day. The absorption solution is replenished (~ 35 L)  
12 weekly.

13 As the WRD and SJAC samples are injected from the syringes to the detector box, the  
14 sample is automatically mixed with an internal standard that contains a known concentration of  
15 lithium bromide (LiBr). The making of the lithium bromide solution requires two steps. First, a  
16 stock solution is prepared by dissolving 4000 mg of LiBr (6.94% Li, 79.90% Br) in a 1 L  
17 volumetric flask, yielding concentrations of 320 mg L<sup>-1</sup> Li and 3680 mg L<sup>-1</sup> Br. This stock is  
18 stable for at least 12 months, if stored away from light and refrigerated. Internal standard stock  
19 solution (5.6 mL) is then injected into a 5 L container using a pipette. The container is then filled  
20 up with DDI water to a weight of 5600 g. This gives final concentrations of 320  $\mu$ g L<sup>-1</sup> for Li and  
21 3680  $\mu$ g L<sup>-1</sup> for Br. The Li and Br internal standard concentrations were verified by an  
22 independent IC system. Stocks are prepared from NIST-traceable LiBr standards (Fisher  
23 Scientific, Pittsburgh, PA). The internal standard is replenished bimonthly.

24           Separate eluents are needed for both the cation and anion ICs. The cation eluent is  
25 prepared by injecting 2.08 mL of pure methanesulfonic acid (MSA) into a 10 L container, which  
26 is filled with 10 kg of DDI water. This yields a final MSA concentration of 3.2 mmol L<sup>-1</sup>. The  
27 anion eluent is prepared by adding 8.68 g of sodium carbonate monohydrate and 6.72 g of  
28 anhydrous sodium bicarbonate to 10 kg DDI water, which yields a final concentration of 7.0  
29 mmol for sodium carbonate and 8 mmol of sodium bicarbonate. Eluents are prepared from  
30 certified chemicals (Fisher Scientific, Pittsburgh, PA). Eluents are replenished biweekly.

31           To further improve the sensitivity of the anion IC, a suppressor regenerant is used. This  
32 chemical improves sensitivity by suppressing eluent background conductivity. An ion-exchange  
33 unit is regenerated before each analysis with phosphoric acid. The phosphoric acid in the ion-  
34 exchange unit is then rinsed by anion eluent. The suppressor regenerant is made by combining 5  
35 kg of DDI water and 125 mL of 85% phosphoric acid (H<sub>3</sub>PO<sub>4</sub>) in a 5-L container, giving a final  
36 concentration of 0.35 mol L<sup>-1</sup> of H<sub>3</sub>PO<sub>4</sub>. The regenerant is made from a certified phosphoric acid  
37 stock (Fisher Scientific, Pittsburgh, PA). Regenerant is replenished bimonthly.

38

39

40

41

42

43

44

45 **Section S2.3.1 Additional information on external standard liquid solutions**

46 External standard liquid solutions were made by dissolving chemicals using 18.2 MΩ.cm  
47 double deionized (DDI) water. The chemicals used were ammonium nitrate (NH<sub>4</sub>NO<sub>3</sub>) (Fisher  
48 Scientific, Pittsburgh, PA), ammonium sulfate ((NH<sub>4</sub>)<sub>2</sub>SO<sub>4</sub>) (Fisher Scientific, Pittsburgh, PA),  
49 potassium chloride (KCl) (Fisher Scientific, Pittsburgh, PA), sodium nitrate (NaNO<sub>3</sub>) (Fluka, St.  
50 Louis, MO), and magnesium sulfate heptahydrate (MgSO<sub>4</sub> 7H<sub>2</sub>O) (Fluka, St. Louis, MO). All  
51 chemicals were ACS (American Chemical Society) grade. Each external standard solution was  
52 diluted to the desired concentration using 18.2 MΩ.cm double deionized (DDI) water.

53

54

55

56

57

58

59

60

61

62

63

64

### 65 **Section S2.3.2 Additional information on methodology used to determine detection limit**

66 The traditional approach used to determine the detection limit involves combining data  
67 from all analytical channels (in this study, there are four different channels including denuder  
68 and SJAC samples from both sample boxes) into a single data set. From this single data set, the  
69 standard deviation and number of analyses are used to determine the detection limit. The  
70 advantage of this approach is that, for an experiment of given duration, a larger number of  
71 observation (i.e., degrees of freedom) are available to calculate the detection limit. However,  
72 with this approach it is unknown whether the detection limit is strictly a function of the analytical  
73 core of the system or is a combination of the analytical and sampling components of the system.  
74 In other words, the standard deviation may reflect a combination of random error plus systematic  
75 error between channels. To investigate this possibility, the traditional detection limit approach  
76 was conducted in conjunction with the Dunn's test (Dunn, 1964) and the Brown-Forsythe test  
77 (Brown and Forsythe, 1974) to compare channels. The Dunn's test and the Brown-Forsythe test  
78 are non-parametric tests that can be used to determine if there are significant differences in the  
79 median concentrations (Dunn's test) and variance (Brown-Forsythe test) across channels. In  
80 further detail, the Dunn's test (Dunn, 1964) is a non-parametric statistical test of the difference in  
81 medians among multiple groups. It is a rank-sum type test in which the null hypothesis is that the  
82 probability of observing a randomly selected value from the one group that is larger than a  
83 randomly selected value from another group equals one half. Dunn's test is appropriate for  
84 comparing multiple groups consisting of continuous data. In this case, Dunn's test is used to  
85 assess whether the differences in analytical detection limits calculated for individual MARGA  
86 channels (Denuder1, Denuder2, SJAC1, SJAC2) are at least partially the result of systematic  
87 differences (bias) among the channels. The Brown-Forsythe test (Brown and Forsythe, 1974) is a

88 non-parametric statistical test for the equality of variances among multiple groups. For each  
89 observation, a transformation ( $z$ ) is calculated as its deviation from the corresponding group  
90 median. A one-way analysis of variance (ANOVA) is performed on  $z$ , in which the F statistic  
91 represents the Brown-Forsythe test statistic. In this case, the Brown-Forsythe test is used to  
92 assess whether the differences in analytical detection limits calculated for individual MARGA  
93 channels (Denuder1, Denuder2, SJAC1, SJAC2) are at least partially the result of differences in  
94 precision (variance) among the channels.

95

96

97

98

99

100

101

102

103

104

105

106

107

108 **Section S3.1.1 Tables and figures associated with the accuracy results**

109

110 Table S1. MARGA blank concentrations expressed as equivalent air concentration for each  
 111 sample box (SB).

112

|         | Blank concentration ( $\mu\text{g m}^{-3}$ ) |                |                    |               |                 |               |               |              |
|---------|----------------------------------------------|----------------|--------------------|---------------|-----------------|---------------|---------------|--------------|
|         | $\text{NO}_3^-$                              | $\text{HNO}_3$ | $\text{SO}_4^{2-}$ | $\text{SO}_2$ | $\text{NH}_4^+$ | $\text{NH}_3$ | $\text{Na}^+$ | $\text{K}^+$ |
| 114 SB1 | 0.001 <sup>a</sup>                           | 0              | 0.040              | 0.037         | 0               | 0             | 0             | 0            |
| 115     | 0.006 <sup>b</sup>                           | 0.003          | 0.013              | 0.012         | 0               | 0             | 0             | 0            |
| 116     | 33 <sup>c</sup>                              | 37             | 33                 | 37            | 33              | 37            | 33            | 37           |
| 117 SB2 | 0.001                                        | 0              | 0.034              | 0.035         | 0               | 0.001         | 0             | 0            |
| 118     | 0.003                                        | 0.001          | 0.015              | 0.011         | 0               | 0.005         | 0             | 0            |
| 119     | 37                                           | 35             | 37                 | 35            | 37              | 35            | 37            | 35           |

120 <sup>a</sup> Mean concentration

121 <sup>b</sup>  $\pm 1$  standard deviation

122 <sup>c</sup> Number of observations

123

124

125

126

127

128

129

130

131

132

133

134

135

136

137

138

139

140

141 Table S2. HNO<sub>3</sub> and NO<sub>3</sub><sup>-</sup> external standard runs and the difference between expected and  
 142 observed concentration.

|                              | SB1 concentrations (µg m <sup>-3</sup> ) |                  |                                     | SB2 concentrations (µg m <sup>-3</sup> ) |       |                        |
|------------------------------|------------------------------------------|------------------|-------------------------------------|------------------------------------------|-------|------------------------|
|                              | Exp <sup>a</sup>                         | Obs <sup>b</sup> | Difference <sup>c</sup><br>(offset) | Exp                                      | Obs   | Difference<br>(offset) |
|                              | 0                                        | 0                | 0                                   | 0                                        | 0     | 0                      |
| HNO <sub>3</sub>             | 0.133                                    | 0.192            | 0.060                               | 0.128                                    | 0.181 | 0.053                  |
|                              | 0.380                                    | 0.528            | 0.149                               | 0.366                                    | 0.502 | 0.136                  |
|                              | 1.345                                    | 1.523            | 0.178                               | 1.303                                    | 1.479 | 0.176                  |
|                              | 2.302                                    | 2.483            | 0.181                               | 2.219                                    | 2.404 | 0.186                  |
|                              | 0                                        | 0.001            | 0.001                               | 0                                        | 0.001 | 0.001                  |
| NO <sub>3</sub> <sup>-</sup> | 0.131                                    | 0.186            | 0.05                                | 0.126                                    | 0.183 | 0.057                  |
|                              | 0.374                                    | 0.518            | 0.144                               | 0.360                                    | 0.488 | 0.128                  |
|                              | 1.324                                    | 1.487            | 0.163                               | 1.283                                    | 1.435 | 0.153                  |
|                              | 2.266                                    | 2.438            | 0.172                               | 2.184                                    | 2.369 | 0.185                  |

143 <sup>a</sup> Expected concentration.

144 <sup>b</sup> Observed concentration.

145 <sup>c</sup> Difference between expected and observed concentration (i.e. observed concentration minus expected  
 146 concentration).

147

148

149

150



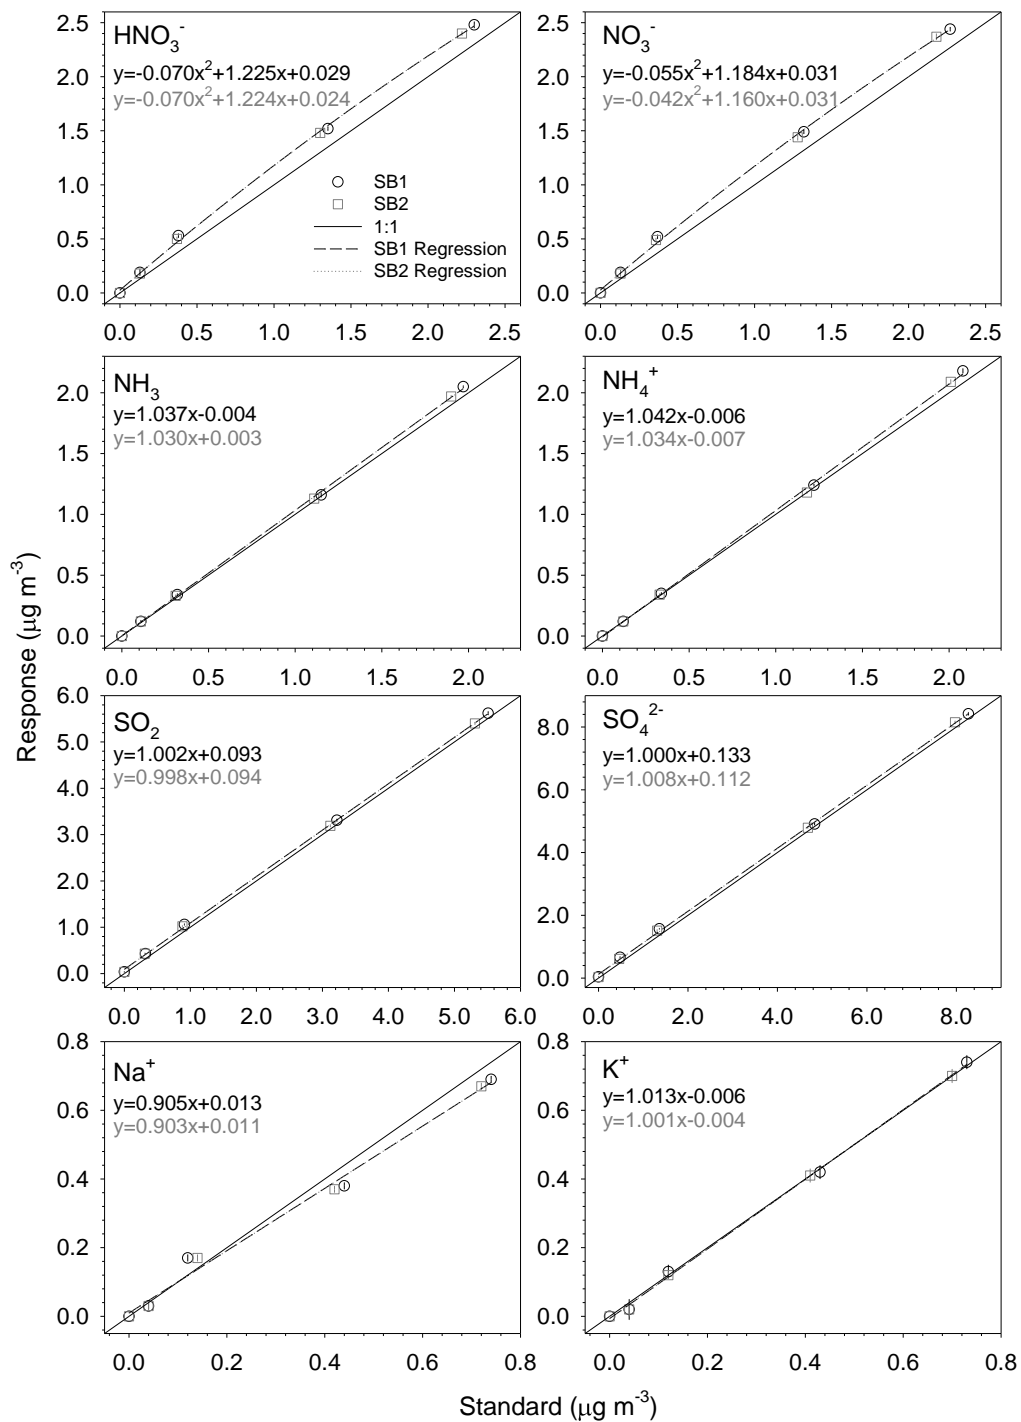

176 Figure S1. Results of external standard tests. Response is given in equivalent air concentration  
 177 ( $\mu\text{g m}^{-3}$ ).

178

179

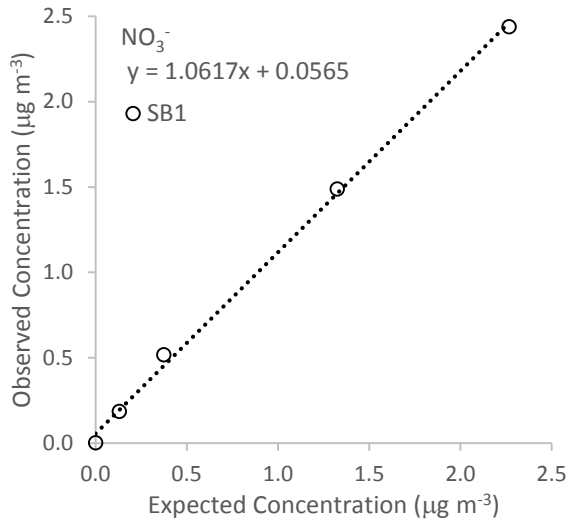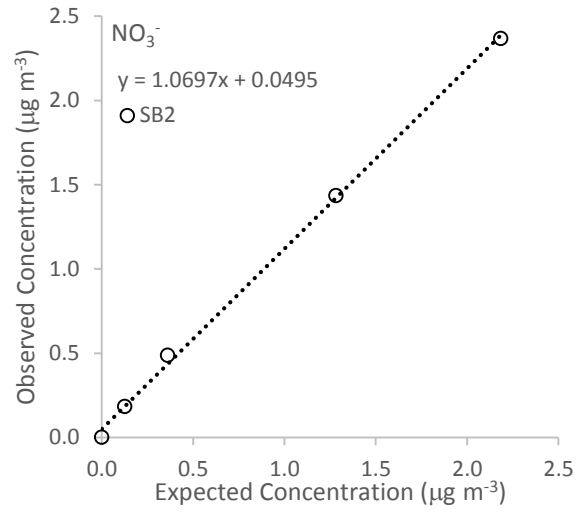

180

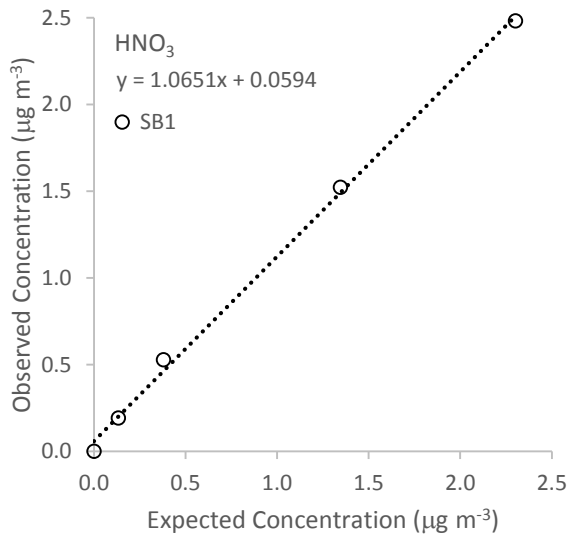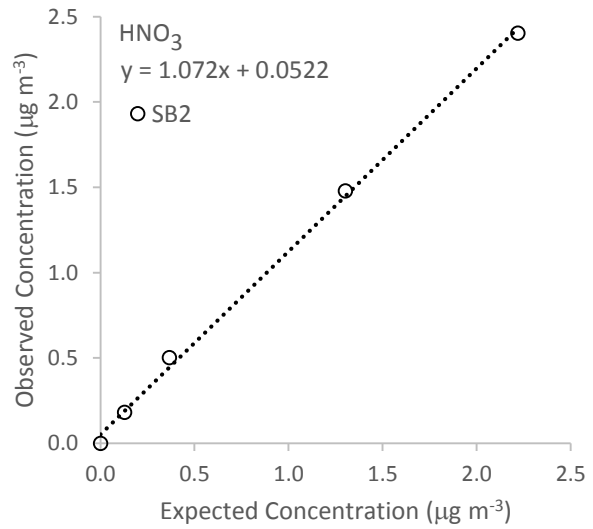

182

183 Figure S2. NO<sub>3</sub><sup>-</sup> linear regression analysis for external standard tests.

184 **Section S3.1.2.a Results and analysis of Dunn’s test and Brown-Forsythe’s test**

185 The results of the Dunn’s test and Brown-Forsythe test for each analyte are presented in Table  
 186 S3.

187 Table S3. Results of the Dunn’s test (DU) and Brown-Forsythe test (BF) for individual MARGA  
 188 channels. Top row indicates channels being compared: S1 = SJAC Sample Box 1, D1 =  
 189 Denuder Sample Box 1, etc. For the Brown-Forsythe test, p values are reported with bold  
 190 indicating statistical significance at the 10% level. For Dunn’s test, N and D indicated not  
 191 significantly different versus significantly different, respectively.

|     |                                | S1-S2 | S1-D1       | S1-D2       | S2-D1       | S2-D2       | D1-D2       |          |
|-----|--------------------------------|-------|-------------|-------------|-------------|-------------|-------------|----------|
| 193 | NO <sub>3</sub> <sup>-</sup>   | DU    | N           | N           | N           | N           | N           |          |
|     |                                | BF    | <b>0.09</b> | 0.86        | 0.45        | <b>0.08</b> | <b>0.04</b> | 0.60     |
| 194 | SO <sub>4</sub> <sup>2-a</sup> | DU    | N           | <b>D</b>    | <b>D</b>    | <b>D</b>    | <b>D</b>    | N        |
|     |                                | BF    | 0.80        | 0.18        | 0.24        | 0.29        | 0.38        | 0.88     |
| 195 | SO <sub>4</sub> <sup>2-</sup>  | DU    | N           | <b>D</b>    | <b>D</b>    | <b>D</b>    | <b>D</b>    | N        |
| 196 |                                | BF    | 0.80        | 0.18        | 0.24        | 0.29        | 0.38        | 0.88     |
| 197 | NH <sub>4</sub> <sup>+</sup>   | DU    | N           | N           | <b>D</b>    | N           | <b>D</b>    | <b>D</b> |
|     |                                | BF    | 0.71        | <b>0.04</b> | <b>0.01</b> | <b>0.10</b> | <b>0.02</b> | 0.35     |
| 198 | Na <sup>+</sup>                | DU    | N           | <b>D</b>    | <b>D</b>    | <b>D</b>    | N           | N        |
|     |                                | BF    | 0.86        | 0.48        | 0.84        | 0.65        | 0.97        | 0.70     |
| 199 | Na <sup>+</sup>                | DU    | N           | N           | N           | N           | N           | N        |
|     |                                | BF    | 0.28        | 0.15        | 0.22        | <b>0.02</b> | <b>0.05</b> | 0.89     |
| 200 | K <sup>+</sup>                 | DU    | N           | N           | N           | N           | N           | N        |
| 201 |                                | BF    | 0.19        | 0.85        | 0.72        | 0.26        | 0.35        | 0.87     |

202 <sup>a</sup> Detection limits for SO<sub>4</sub><sup>2-</sup> and Na<sup>+</sup> were determined using two liquid standards with different concentrations.  
 203

204 The results of Dunn’s test and Brown-Forsythe test (Table S3) indicate that the sampling  
 205 components of the MARGA are influencing the detection limit of all the compounds except K<sup>+</sup>.  
 206 The influence of the sampling components of the MARGA on the detection limit varies from  
 207 compound to compound. In both SO<sub>4</sub><sup>2-</sup> detection limit analyses there were multiple channels that  
 208 had significant differences in median concentrations. For NO<sub>3</sub><sup>-</sup>, the detection limit was not  
 209 influenced by differences in channel medians, but was influenced by differences in the channel  
 210 variance with three of the six channel to channel comparisons having a Brown-Forsythe p-value  
 211 less than 0.10. It is not known what is causing the significant differences in channel variance, but

212 it is hypothesized that inconsistency in peak integration may be an issue. Differences in channel  
213 median concentrations and/or concentration variance also influenced the determined detection  
214 limit for  $\text{Na}^+$  and  $\text{NH}_4^+$ . It can therefore be concluded that analytical detection limits calculated  
215 by combining channels is function of variability related to random error in individual channels,  
216 systematic differences across channels, and differences in variance across channel

217 Section S3.1.2.b Detection limits for individual MARGA channels

218 Table S4. Detection limit results for individual MARGA channels.

|                                |                                                        | Exp conc <sup>b</sup><br>(µg L <sup>-1</sup> ) | Median Obs <sup>c</sup><br>(µg L <sup>-1</sup> ) | St Dev <sup>d</sup><br>(µg L <sup>-1</sup> ) | N <sup>e</sup> | T-stat | Liq Conc DL<br>(µg L <sup>-1</sup> ) | Air Conc DL<br>(µg m <sup>-3</sup> ) |
|--------------------------------|--------------------------------------------------------|------------------------------------------------|--------------------------------------------------|----------------------------------------------|----------------|--------|--------------------------------------|--------------------------------------|
| NO <sub>3</sub> <sup>-</sup>   | D1                                                     |                                                | 7.64                                             | 0.76                                         | 19             | 1.33   | 2.02                                 | 0.050                                |
|                                | D2                                                     | 5.34                                           | 8.05                                             | 0.65                                         | 14             | 1.35   | 1.76                                 | 0.044                                |
|                                | S1                                                     |                                                | 7.60                                             | 0.75                                         | 19             | 1.33   | 2.00                                 | 0.050                                |
|                                | S2                                                     |                                                | 7.89                                             | 1.14                                         | 20             | 1.33   | 3.03                                 | 0.076                                |
|                                | Average NO <sub>3</sub> <sup>-</sup> /HNO <sub>3</sub> |                                                |                                                  |                                              |                |        |                                      | <b>2.20</b>                          |
| SO <sub>4</sub> <sup>2-a</sup> | D1                                                     |                                                | 2.15                                             | 0.74                                         | 37             | 1.31   | 1.93                                 | 0.048                                |
|                                | D2                                                     | 0.00                                           | 2.05                                             | 0.70                                         | 35             | 1.31   | 1.83                                 | 0.046                                |
|                                | S1                                                     |                                                | 1.65                                             | 0.54                                         | 33             | 1.31   | 1.41                                 | 0.035                                |
|                                | S2                                                     |                                                | 1.49                                             | 0.62                                         | 37             | 1.31   | 1.62                                 | 0.040                                |
|                                | Average SO <sub>4</sub> <sup>2-</sup> /SO <sub>2</sub> |                                                |                                                  |                                              |                |        |                                      | <b>1.70</b>                          |
| SO <sub>4</sub> <sup>2-</sup>  | D1                                                     |                                                | 26.40                                            | 0.63                                         | 19             | 1.33   | 1.68                                 | 0.042                                |
|                                | D2                                                     | 19.47                                          | 27.06                                            | 0.98                                         | 14             | 1.35   | 2.65                                 | 0.066                                |
|                                | S1                                                     |                                                | 27.39                                            | 1.08                                         | 19             | 1.33   | 2.87                                 | 0.072                                |
|                                | S2                                                     |                                                | 25.92                                            | 0.63                                         | 20             | 1.33   | 1.67                                 | 0.042                                |
|                                | Average SO <sub>4</sub> <sup>2-</sup> /SO <sub>2</sub> |                                                |                                                  |                                              |                |        |                                      | <b>2.21</b>                          |
| NH <sub>4</sub> <sup>+</sup>   | D1                                                     |                                                | 5.11                                             | 0.26                                         | 19             | 1.33   | 0.69                                 | 0.017                                |
|                                | D2                                                     | 4.91                                           | 5.51                                             | 0.33                                         | 14             | 1.35   | 0.89                                 | 0.022                                |
|                                | S1                                                     |                                                | 4.93                                             | 0.17                                         | 20             | 1.33   | 0.45                                 | 0.011                                |
|                                | S2                                                     |                                                | 4.91                                             | 0.19                                         | 20             | 1.33   | 0.50                                 | 0.013                                |
|                                | Average NH <sub>4</sub> <sup>+</sup> /NH <sub>3</sub>  |                                                |                                                  |                                              |                |        |                                      | <b>0.63</b>                          |
| Na <sup>+</sup>                | D1                                                     |                                                | 1.63                                             | 0.49                                         | 19             | 1.33   | 1.30                                 | 0.033                                |
|                                | D2                                                     | 1.75                                           | 1.53                                             | 0.45                                         | 14             | 1.35   | 1.22                                 | 0.030                                |
|                                | S1                                                     |                                                | 1.39                                             | 0.35                                         | 20             | 1.33   | 0.93                                 | 0.023                                |
|                                | S2                                                     |                                                | 1.42                                             | 0.45                                         | 20             | 1.33   | 1.19                                 | 0.030                                |
|                                | Average                                                |                                                |                                                  |                                              |                |        |                                      | <b>1.16</b>                          |
| Na <sup>+</sup>                | D1                                                     |                                                | 7.25                                             | 0.28                                         | 20             | 1.33   | 0.74                                 | 0.019                                |
|                                | D2                                                     | 5.00                                           | 7.16                                             | 0.20                                         | 21             | 1.33   | 0.53                                 | 0.013                                |
|                                | S1                                                     |                                                | 7.03                                             | 0.44                                         | 18             | 1.33   | 1.17                                 | 0.029                                |
|                                | S2                                                     |                                                | 7.01                                             | 0.54                                         | 21             | 1.33   | 1.43                                 | 0.036                                |
|                                | Average                                                |                                                |                                                  |                                              |                |        |                                      | <b>0.97</b>                          |
| K <sup>+</sup>                 | D1                                                     |                                                | 5.14                                             | 0.64                                         | 20             | 1.33   | 1.70                                 | 0.042                                |
|                                | D2                                                     | 4.91                                           | 5.68                                             | 0.58                                         | 21             | 1.33   | 1.54                                 | 0.038                                |
|                                | S1                                                     |                                                | 5.03                                             | 0.67                                         | 18             | 1.33   | 1.79                                 | 0.045                                |
|                                | S2                                                     |                                                | 5.31                                             | 0.53                                         | 21             | 1.33   | 1.40                                 | 0.033                                |
|                                | Average                                                |                                                |                                                  |                                              |                |        |                                      | <b>1.61</b>                          |

219 <sup>a</sup> Detection limits for SO<sub>4</sub><sup>2-</sup> and Na<sup>+</sup> were determined using two liquid standard with different concentrations.

220 <sup>b</sup> Expected concentration.

221 <sup>c</sup> Median observed concentration.

222 <sup>d</sup> ± 1 standard deviation.

223 <sup>e</sup> Number of observations.

224

225

226

227 **Section S3.1.2.c Additional analysis of the detection limits in comparison to previous**  
 228 **studies**

229 Thomas et al. (2009) and Wolff et al. (2010) determined detection limits in field  
 230 conditions using the GRAEGOR system, which is quasi-similar to the MARGA system.  
 231 However, they used different methodologies to determine their detection limit. Therefore, in  
 232 order to make an equivalent comparison, the detection limits were also calculated for this study  
 233 using the Thomas et al. (2009) and Wolff et al. (2010) detection limit methodologies. Thomas et  
 234 al. (2009) calculated average blanks using average blank values plus three standard deviations of  
 235 the blank value, whereas Wolff et al. (2010) used three standard deviations of the blank value.  
 236 The results are shown in Table S5.

237  
 238 Table S5. Calculate detection limits from this study using different methodologies

|                            | Detection limit calculation<br>for data in this study using<br>different methodologies ( $\mu\text{g m}^{-3}$ ) |                            |                           | Previous studies detection limits<br>( $\mu\text{g m}^{-3}$ ) |       |                        |       |
|----------------------------|-----------------------------------------------------------------------------------------------------------------|----------------------------|---------------------------|---------------------------------------------------------------|-------|------------------------|-------|
|                            | This<br>study                                                                                                   | Thomas<br>et al.<br>(2009) | Wolff<br>et al.<br>(2010) | Thomas et<br>al. (2009)                                       |       | Wolff et<br>al. (2010) |       |
|                            |                                                                                                                 |                            |                           | MPIC                                                          | CEH   | NEU                    | EGER  |
| $\text{NO}_3^-$            | 0.056                                                                                                           | 0.066                      | 0.065                     | 0.077                                                         | 0.150 | 0.093                  | 0.130 |
| $\text{HNO}_3$             | 0.057                                                                                                           | 0.066                      | 0.066                     | 0.079                                                         | 0.191 | 0.094                  | 0.132 |
| $\text{SO}_4^{2-\text{a}}$ | 0.048                                                                                                           | 0.093                      | 0.056                     | 0.201                                                         | 0.116 | -                      | -     |
| $\text{SO}_2$              | 0.032                                                                                                           | 0.073                      | 0.037                     | 0.123                                                         | 0.254 | -                      | -     |
| $\text{SO}_4^{2-}$         | 0.064                                                                                                           | 0.112                      | 0.075                     | -                                                             | -     | -                      | -     |
| $\text{SO}_2$              | 0.043                                                                                                           | 0.086                      | 0.050                     | -                                                             | -     | -                      | -     |
| $\text{NH}_4^+$            | 0.021                                                                                                           | 0.025                      | 0.025                     | 0.117                                                         | 0.180 | 0.074                  | 0.022 |
| $\text{NH}_3$              | 0.020                                                                                                           | 0.024                      | 0.023                     | 0.111                                                         | 0.161 | 0.055                  | 0.021 |
| $\text{Na}^+$              | 0.029                                                                                                           | 0.030                      | 0.030                     | -                                                             | -     | -                      | -     |
| $\text{Na}^+$              | 0.026                                                                                                           | 0.033                      | 0.033                     | -                                                             | -     | -                      | -     |
| $\text{K}^+$               | 0.038                                                                                                           | 0.038                      | 0.045                     | -                                                             | -     | -                      | -     |

239

240 In summary, regardless of the detection limit methodology, the detection limits determined in  
241 this study are lower than those determined by Thomas et al. (2009) and Wolff et al. (2010) for all  
242 nitrogen and sulfur compounds with the exception of NH<sub>3</sub>. NH<sub>3</sub> detection limits determined in  
243 this study are lower than those reported by Thomas et al. (2009) and Wolff et al. (2010) at the  
244 grassland NEU site, but similar to those reported by Wolff et al. (2010) at the forest (EGER) site.

245

246

247

248

249

250

251

252

253

254

255

256

257

258

259

260

261

262

263

264

265

266

267 **Section S3.2.1 Tables and figures associated with the concentration gradient precision**  
 268 **(gradient detection limit) results**

269

270 Table S6. Orthogonal least squares regression coefficients comparing SB1 (x) to SB2 (y).  
 271 Results are reported for individual colocation experiments during June-July (Period 1), August  
 272 (Period 2), and October, 2012 (Period 3). Number of hourly observations for each period are  
 273 approximately 87, 138, and 73, respectively.

| Period                        | 1     | 2     | 3     | 1     | 2                                     | 3     |
|-------------------------------|-------|-------|-------|-------|---------------------------------------|-------|
|                               | ----- | Slope | ----- | ----- | Intercept<br>( $\mu\text{g m}^{-3}$ ) | ----- |
| NH <sub>3</sub>               | 0.94  | 1.03  | 0.95  | -0.10 | -0.01                                 | -0.08 |
| NH <sub>4</sub> <sup>+</sup>  | 1.06  | 1.01  | 1.02  | -0.03 | -0.01                                 | -0.01 |
| HNO <sub>3</sub>              | 0.86  | 1.02  | 1.00  | 0.05  | -0.02                                 | -0.01 |
| NO <sub>3</sub> <sup>-</sup>  | 0.87  | 1.06  | 1.03  | 0.02  | -0.02                                 | 0.01  |
| SO <sub>2</sub>               | 0.97  | 1.04  | 1.03  | -0.02 | -0.01                                 | -0.05 |
| SO <sub>4</sub> <sup>2-</sup> | 1.02  | 0.99  | 1.01  | 0.09  | 0.05                                  | 0.01  |

274

275

276

277

278

279

280

281

282

283

284

285

286

287

288



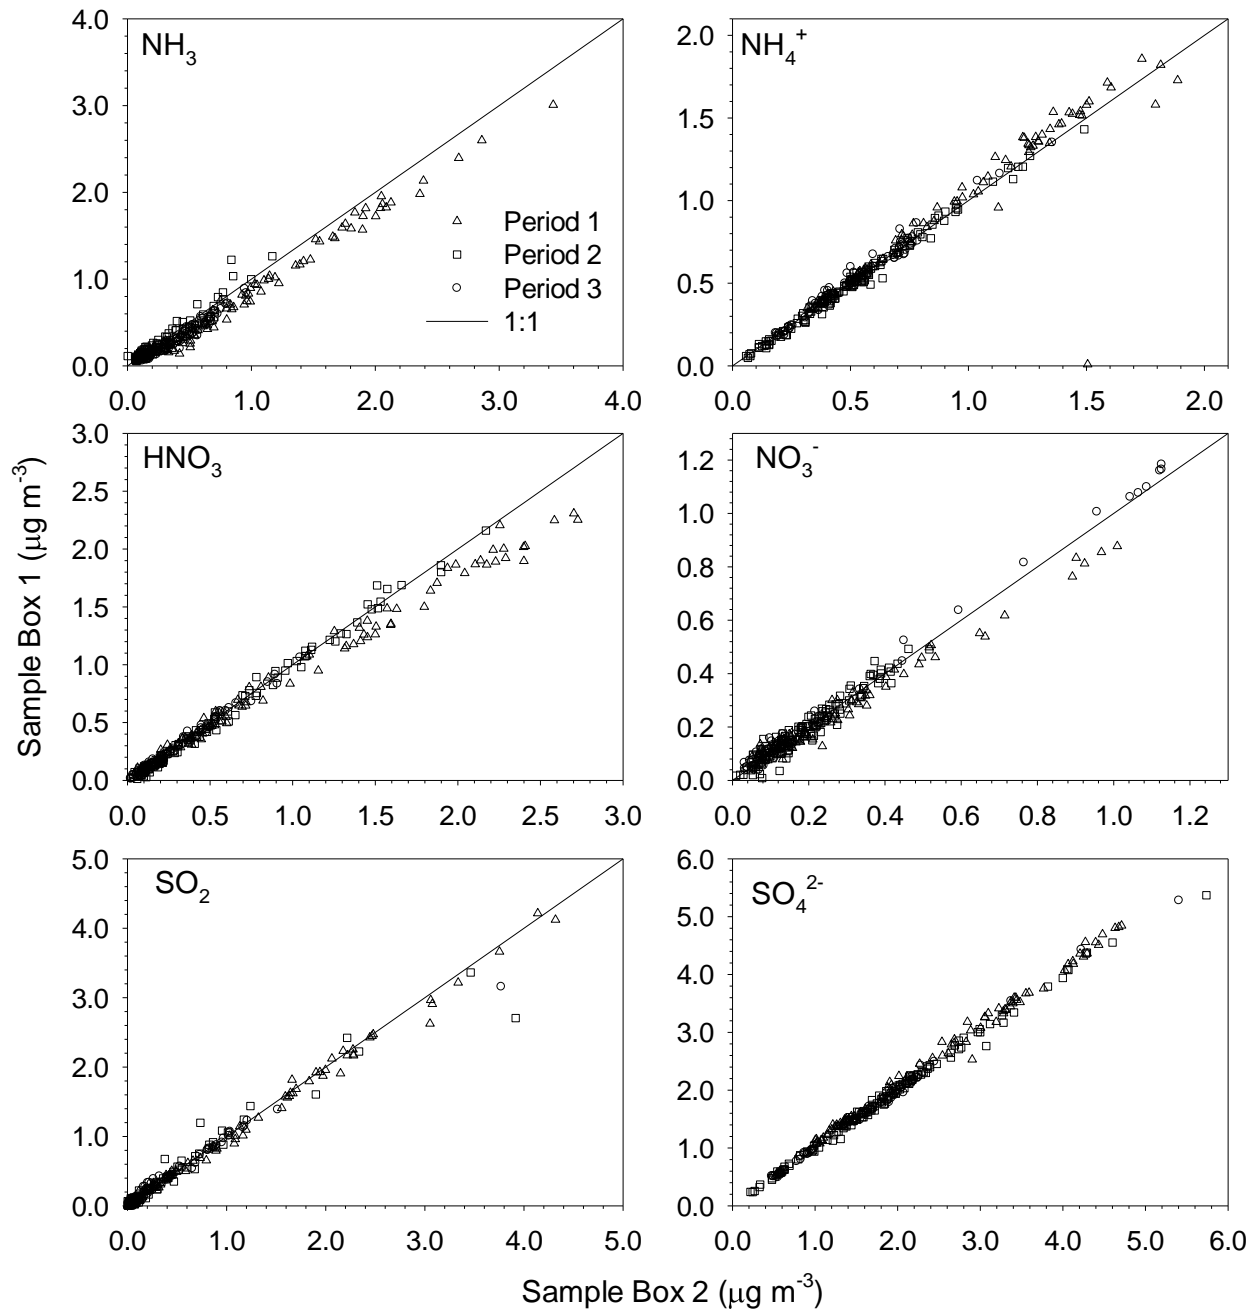

290

291 Figure S3. Scatterplots of concentrations measured by MARGA sample boxes 1 and 2 during  
 292 three collocation experiments represented by different symbols (Period 1= June-July 2012; Period  
 293 2 =August 2012; Period 3= October 2012)

294

295

296

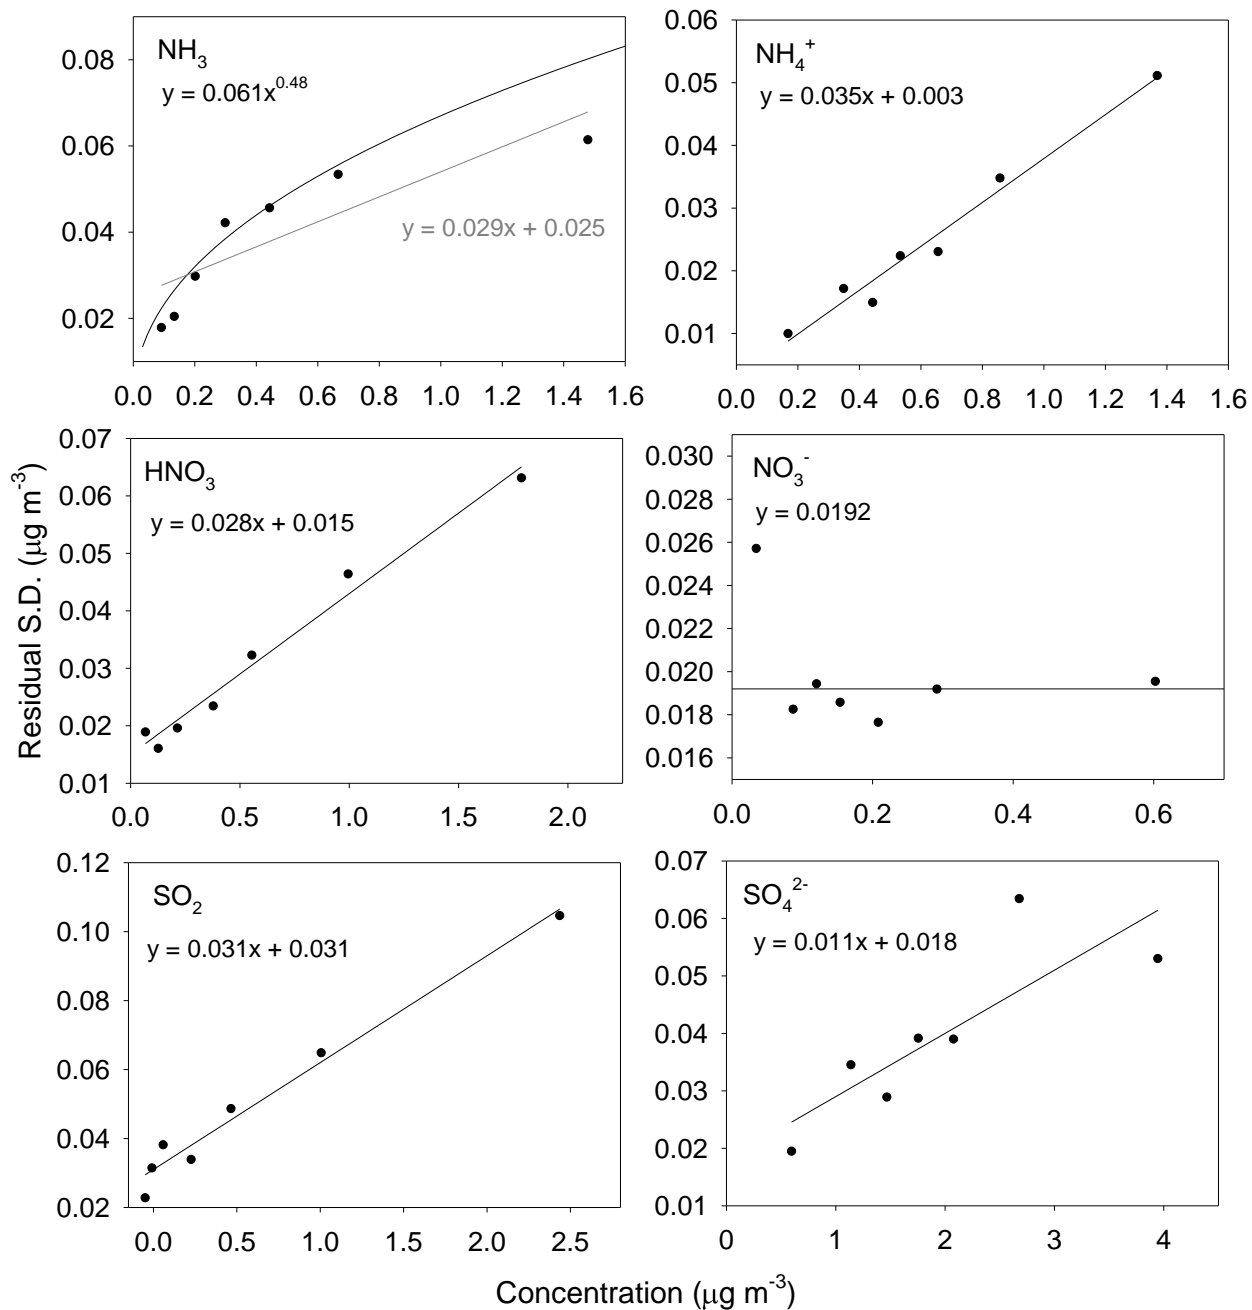

298

299

300 Figure S4. Curves describing relationship between air concentration and the standard deviation  
 301 of orthogonal least squares fits (gradient precision). Data points represent binwise standard  
 302 deviation of residual and corresponding average air concentration. Bins comprise  $\approx 42$   
 303 observations.

304

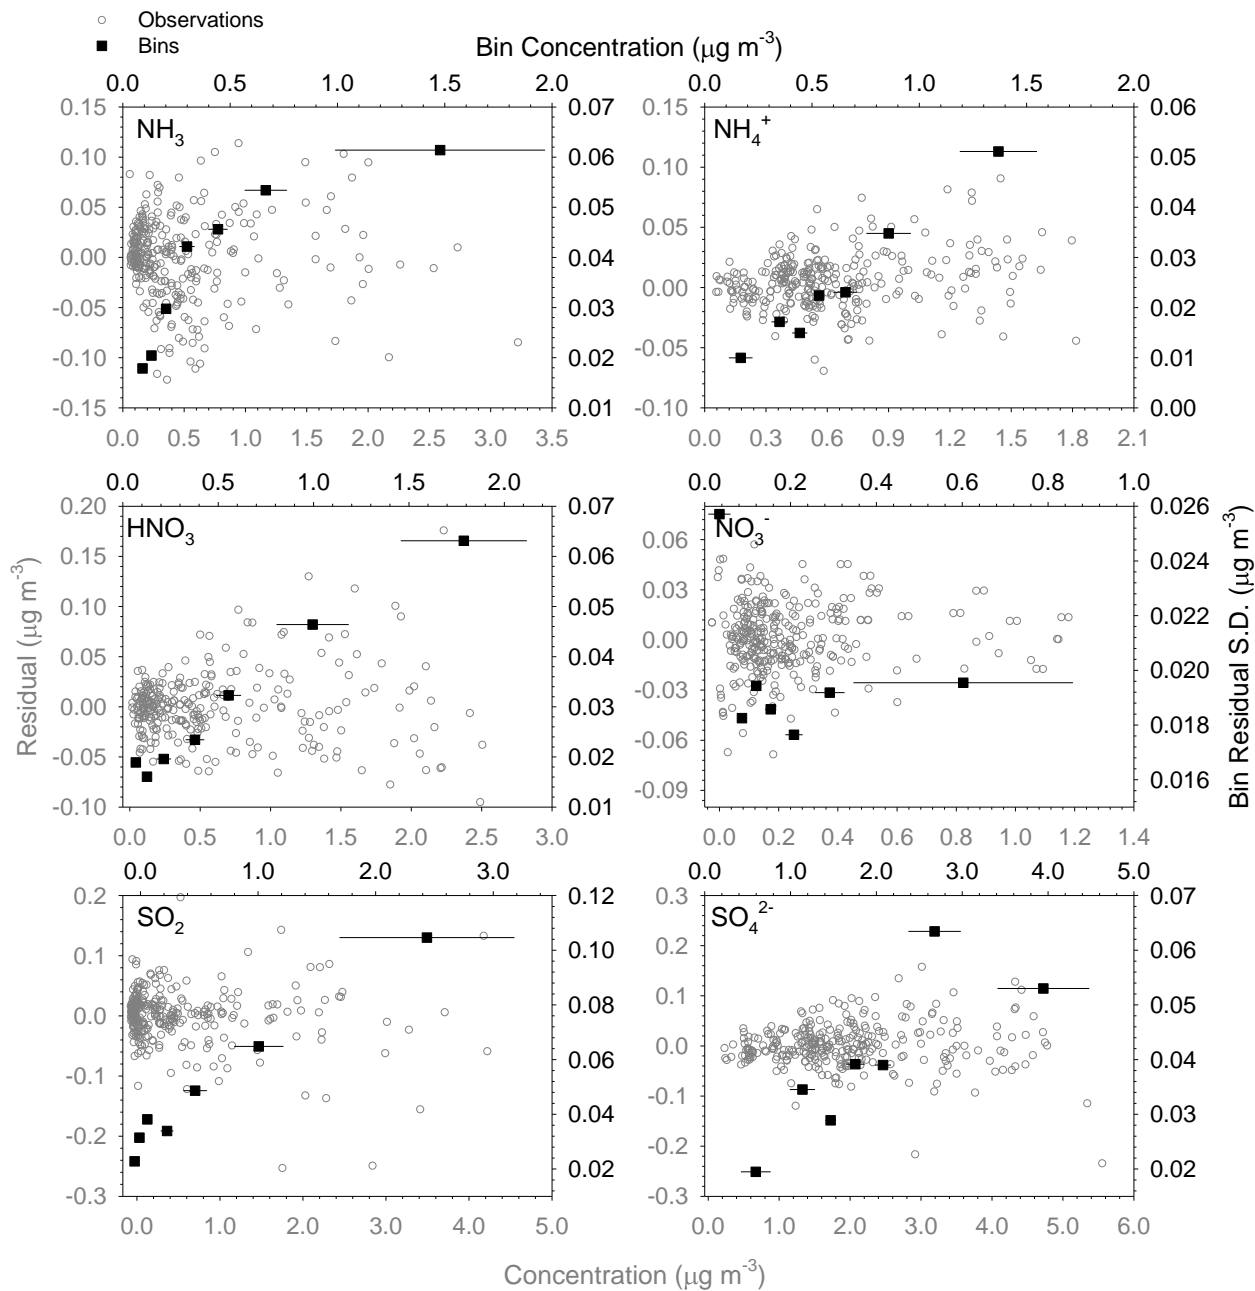

305  
 306 Figure S5. Scatterplots (gray circles) of orthogonal least squares residuals versus average  
 307 concentration between sample boxes. Data from three colocation experiments are combined.  
 308 Black squares represent binwise standard deviation of residuals versus concentration. Horizontal  
 309 bars represent standard deviation of concentration within bin. Individual bins contain  $\approx 42$   
 310 observations.

311

312

313 **Section S3.3.2.a Tables and figures associated with flux uncertainty results**

314 Table S7. Summary statistics for select meteorological variables, air concentrations, and fluxes during the period 23 September – 14  
 315 October, 2012.

|                   | Meteorology                                |                             |                                     | Concentration<br>( $\mu\text{g m}^{-3}$ ) |                              |                  |                              |                 |                               | Flux<br>( $\text{ng m}^{-2} \text{s}^{-1}$ ) |                              |                  |                              |                 |                               |
|-------------------|--------------------------------------------|-----------------------------|-------------------------------------|-------------------------------------------|------------------------------|------------------|------------------------------|-----------------|-------------------------------|----------------------------------------------|------------------------------|------------------|------------------------------|-----------------|-------------------------------|
|                   | W.S. <sup>c</sup><br>( $\text{m s}^{-1}$ ) | u*<br>( $\text{m s}^{-1}$ ) | Air Temp.<br>( $^{\circ}\text{C}$ ) | NH <sub>3</sub>                           | NH <sub>4</sub> <sup>+</sup> | HNO <sub>3</sub> | NO <sub>3</sub> <sup>-</sup> | SO <sub>2</sub> | SO <sub>4</sub> <sup>2-</sup> | NH <sub>3</sub>                              | NH <sub>4</sub> <sup>+</sup> | HNO <sub>3</sub> | NO <sub>3</sub> <sup>-</sup> | SO <sub>2</sub> | SO <sub>4</sub> <sup>2-</sup> |
| Mean              | 0.8                                        | 0.1                         | 15.9                                | 0.4                                       | 0.7                          | 0.3              | 0.4                          | 0.5             | 1.9                           | 9.1                                          | -1.0                         | -4.3             | -3.1                         | -5.5            | -4.0                          |
| Median            | 0.7                                        | 0.1                         | 15.5                                | 0.3                                       | 0.7                          | 0.2              | 0.3                          | 0.1             | 1.8                           | 3.9                                          | -0.4                         | -1.8             | -1.6                         | -1.9            | -2.4                          |
| S.D. <sup>a</sup> | 0.5                                        | 0.1                         | 5.8                                 | 0.3                                       | 0.3                          | 0.3              | 0.3                          | 1.1             | 0.8                           | 11.7                                         | 2.1                          | 6.4              | 4.3                          | 16.8            | 5.1                           |
| Max.              | 2.4                                        | 0.5                         | 28.7                                | 1.6                                       | 1.5                          | 1.8              | 1.2                          | 8.8             | 4.3                           | 82.8                                         | 6.6                          | 6.6              | 18.1                         | 46.7            | 17.7                          |
| Min.              | 0.0                                        | 0.0                         | 4.4                                 | 0.0                                       | 0.2                          | 0.0              | 0.0                          | 0.0             | 0.5                           | -1.4                                         | -14.6                        | -38              | -35.4                        | -245            | -28.9                         |
| N <sup>b</sup>    | 474                                        | 474                         | 474                                 | 449                                       | 376                          | 451              | 384                          | 451             | 384                           | 406                                          | 358                          | 407              | 366                          | 407             | 366                           |

316 <sup>a</sup> S.D.=  $\pm 1$  standard deviation

317 <sup>b</sup> N = number of observations

318 <sup>c</sup> W.S. = Wind Speed

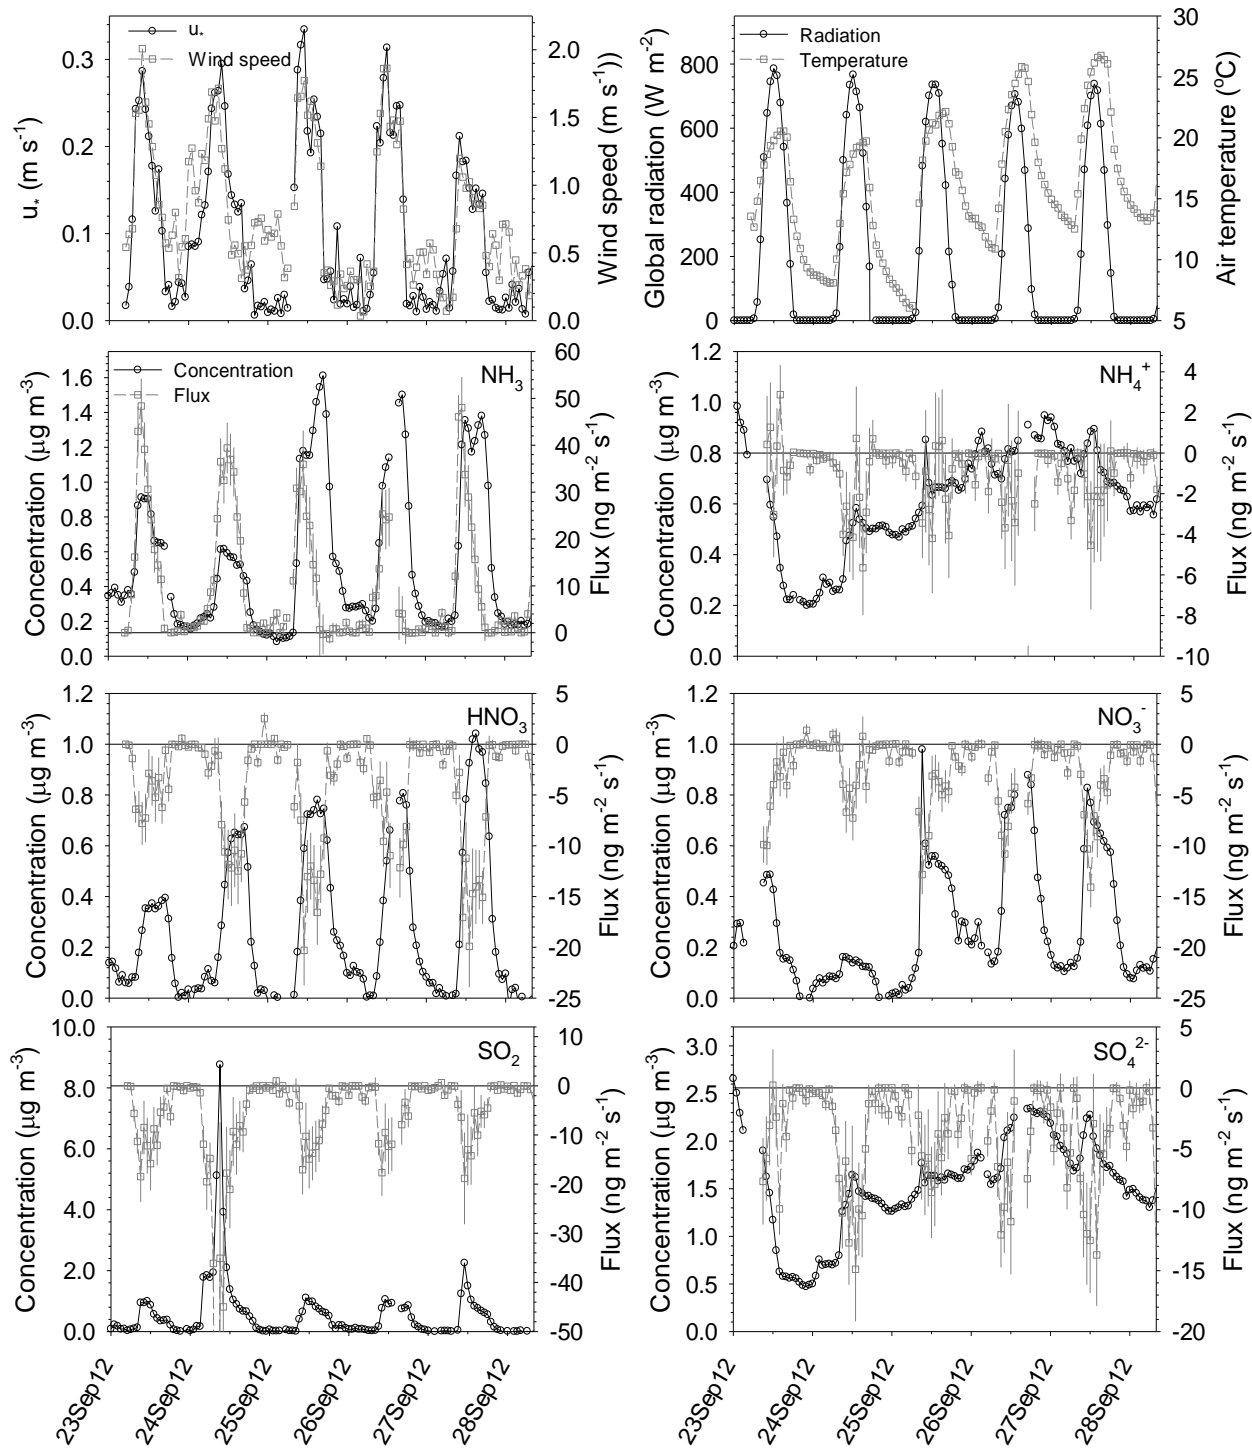

319

320 Figure S6. Example time series of meteorological variables, air concentrations, and fluxes.  
 321 Fluxes also include flux error calculated from equation (4) in the main text. For plots of  
 322 chemical species, concentrations and fluxes are represented by black circles and gray squares,  
 323 respectively.

324 **Section S3.2.2.b Analysis of the influence of the co-location concentration adjustment on**  
325 **calculated fluxes**

326 The influence of the co-location concentration adjustment on calculated fluxes was  
327 determined by performing a sensitivity analysis in which hypothetical colocation corrections  
328 were applied to the three weeks of flux data presented in the manuscript. For this analysis, a  
329 reasonable range of slope and intercept (offset) values were determined based on co-location  
330 slope and offset values from this manuscript (see supplemental Table S6). The influence of co-  
331 location slope and offset values on overall average fluxes was quantified as the percent change in  
332 the average flux, with test values of slope and offset applied, relative to the average flux with a  
333 slope and offset of 1 and 0, respectively. Results are presented in figure S7.

334 Results indicate that the correction for a co-location slope of 1.1 (assuming an offset of  
335 0.0) can change the average flux by 30% for  $\text{HNO}_3$  and approximately a factor of 4.5 for  $\text{NH}_4^+$ .  
336 Correcting for an offset of 0.1 (assuming a slope of 1.0), can change the average flux by 70% for  
337  $\text{SO}_2$  and approximately a factor of 7 for  $\text{NH}_4^+$ . Because concentration gradients are small relative  
338 to the air concentration, the colocation correction can be large, particularly for aerosols, which  
339 deposit more slowly than gases thereby resulting in smaller concentration gradients. It should be  
340 noted that, because concentrations and fluxes (i.e., concentration gradients) vary by site, the  
341 importance of the colocation test will also vary by site. However, the sensitivity analysis  
342 demonstrates that colocation tests are needed to help control the accuracy of the concentration  
343 gradient measurement.

344

345

346

347

348

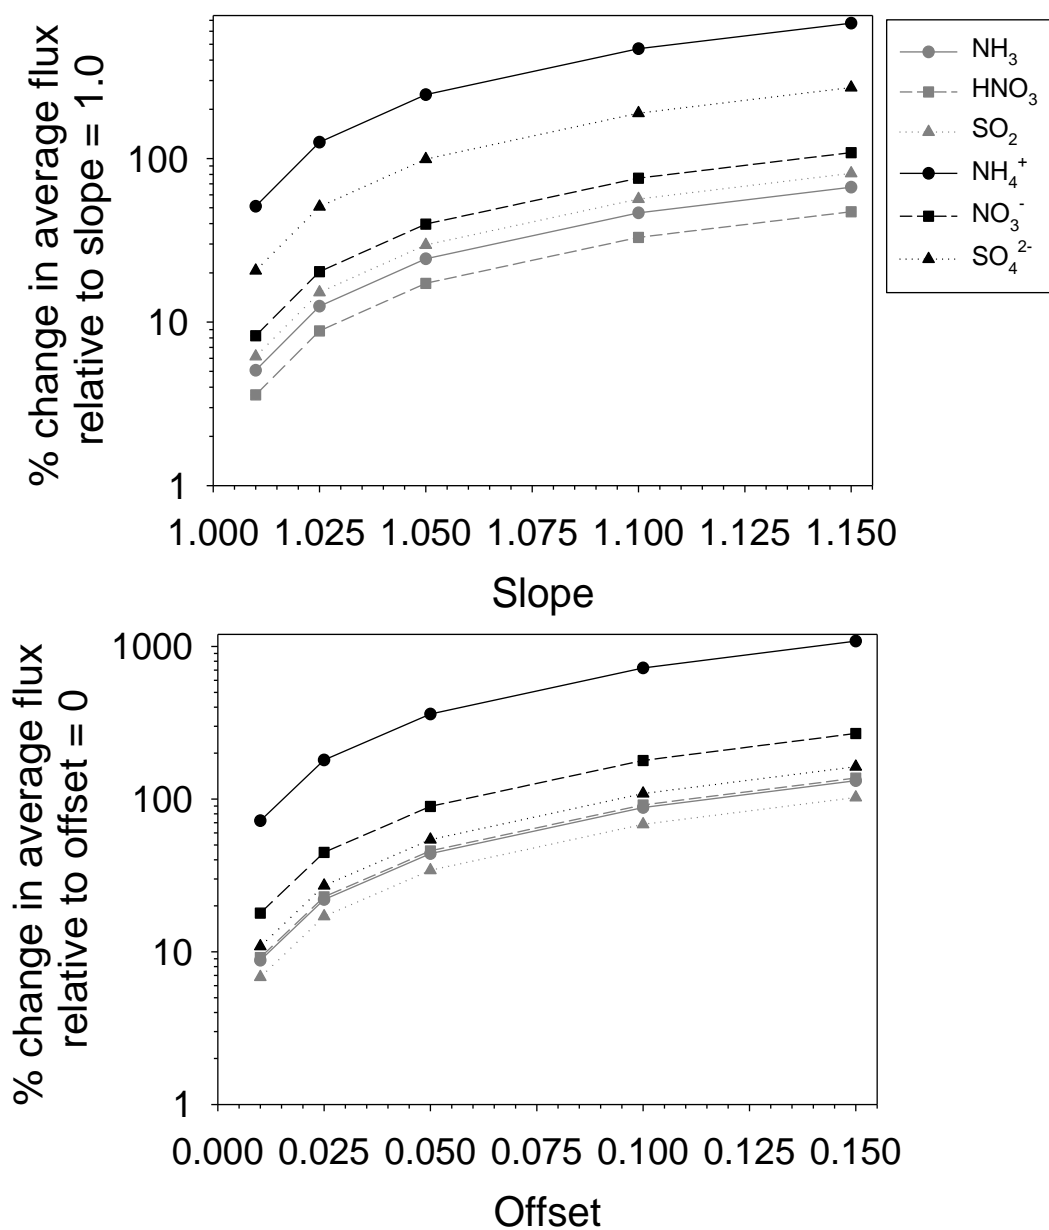

351

352 Figure S7: Results of co-location sensitivity analysis in which hypothetical values of slope and  
 353 offset (intercept) were applied to the observed fluxes.

354

355

356

357

358 **Supporting Information References**

359 Brown, M.B., Forsythe, A.B. Robust tests for equality of variances. *J. Am. Statist. Assoc.* 69  
360 (346), 364–367, DOI 10.1080/01621459.1974.10482955, 1974.

361  
362 Dunn, O.J. Multiple comparisons using rank sums. *Technometrics* 6 (3), 241-252, DOI  
363 10.1080/00401706.1964.10490181, 1964.

364  
365 Thomas, R.M., Trebs, I., Otjes, R., Jongejan, P.A.C., ten Brink, H., Phillips, G., Kortner, M.,  
366 Meixner, F.X., Nemitz, E. An automated analyzer to measure surface-atmosphere exchange  
367 fluxes of water soluble inorganic aerosol compounds and reactive trace gases. *Environ. Sci.*  
368 *Technol.*, 43 (5), 1412-1418, DOI 10.1021/es8019403, 2009.

369  
370 Wolff, V., Trebs, I., Ammann, C., Meixner, F.X. Aerodynamic gradient measurements of the  
371  $\text{NH}_3\text{-HNO}_3\text{-NH}_4\text{NO}_3$  triad using a wet chemical instrument: an analysis of precision  
372 requirements and flux errors. *Atmos. Meas. Tech.*, 3 (1), 187–208, DOI 10.5194/amt-3-187-  
373 2010, 2010.
